# Supplementary material for: Antigenic and Biological Characterization of ORF2–6 Variants at Early Times Following PRRSV Infection
Source: MDPI journal article supplement (doi:10.3390/v9050113), 2017-05-16
Supplement: s1 [file s1]

# Supplementary Materials: Antigenic and Biological Characterization of ORF2-6 Variants at Early Times Following PRRSV Infection

Alyssa B. Evans, Hyelee Loyd, Jenelle R. Dunkelberger, Sarah van Tol, Marcus J. Bolton, Karin S. Dorman, Jack C. M. Dekkers and Susan Carpenter

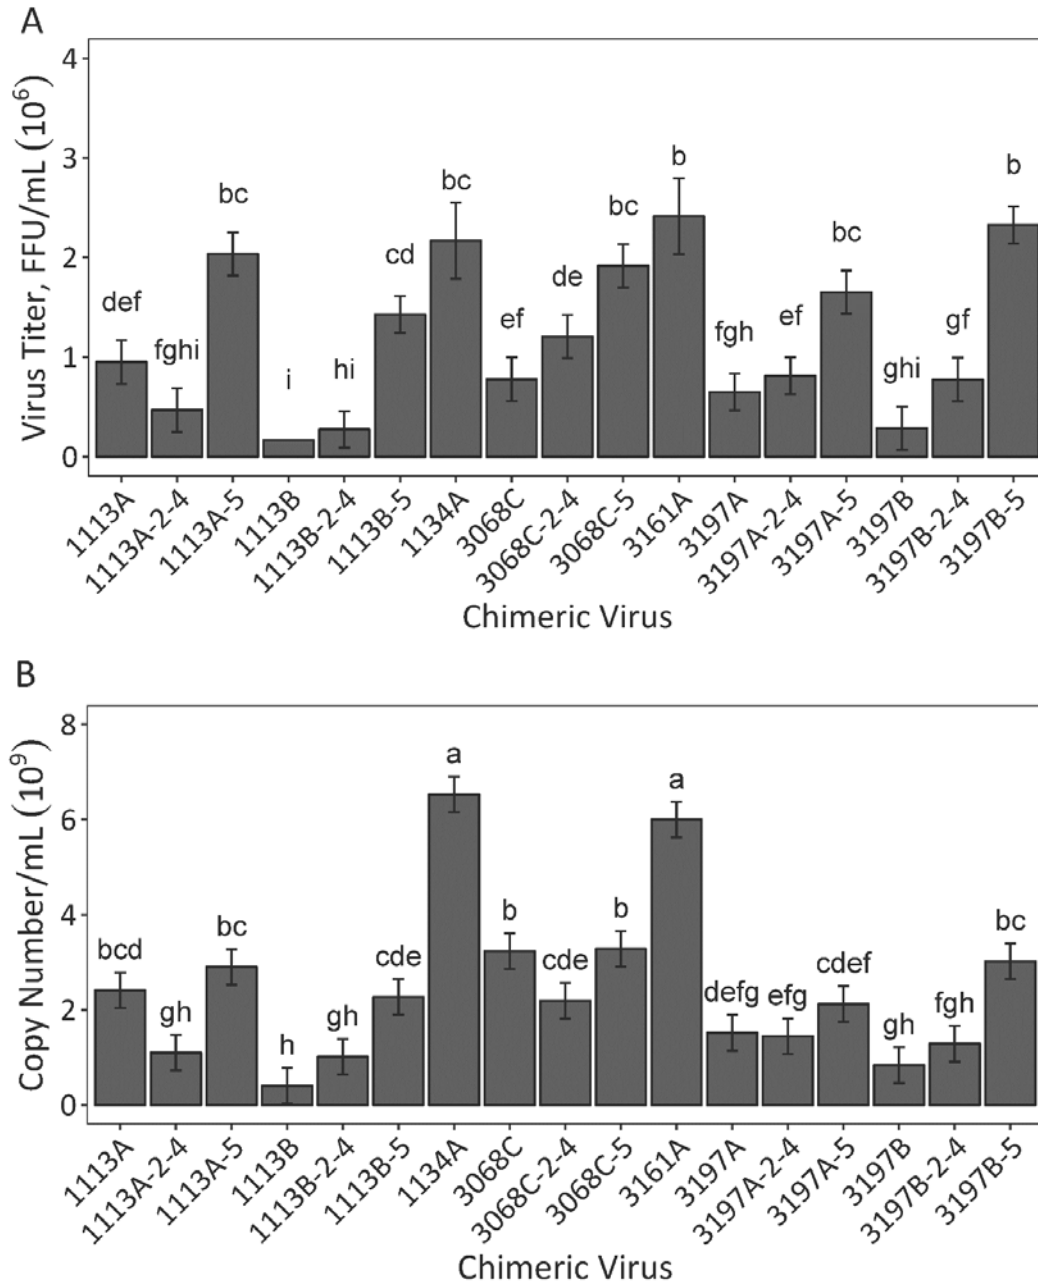

**Figure S1.** Replication phenotype of chimeric virus containing predominant ORF2-6 haplotypes. (A) Virus titers—Stocks of chimeric viruses titrated on MARC-145 cells and reported as focus-forming units per mL stock; (B) Viral RNA was purified from chimeric virus stocks and quantified by RT-qPCR (Applied Biosystems). Results are reported as the least square mean ( $\pm$  standard error) of virus titer and virion copy number. Pairwise comparisons between all viruses were assessed using a student's *t*-test and groups with different letter assignments significantly differ at  $p < 0.05$ .

**Table S1.** Amino Acid changes in ORF2-6 haplotypes from late day samples from pigs with rebound viremia.

| Pig  | Position <sup>a</sup> |            |            | Haplotype A <sup>b</sup> |        | Haplotype B <sup>b</sup> |        | Inoculum <sup>c</sup> |        |
|------|-----------------------|------------|------------|--------------------------|--------|--------------------------|--------|-----------------------|--------|
|      | NT                    | AA         |            | NT                       | AA     | NT                       | AA     | NT                    | AA     |
| 1113 | 114                   | GP2<br>E   | 38*<br>37  | T                        | C<br>F | C                        | C<br>L | T                     | C<br>F |
|      | 291                   | GP2        | 97         | G                        | M      | A                        | I      | G                     | M      |
|      | 909                   | GP3        | 96         | T                        | S      | C                        | P      | C                     | P      |
|      | 1050                  | GP3        | 143        | T                        | F      | T                        | F      | C                     | L      |
|      | 1282                  | GP3<br>GP4 | 220<br>38* | T                        | L<br>T | C                        | P<br>T | T                     | L<br>T |
|      | 1553                  | GP4        | 129        | G                        | V      | G                        | V      | A                     | I      |
|      | 1795                  | GP5<br>5a  | 27<br>30*  | C                        | A<br>C | T                        | V<br>C | C                     | A<br>C |
| 3197 | 68                    | GP2        | 23         | G                        | S      | A                        | N      | A                     | N      |
|      | 134                   | GP2<br>E   | 45<br>43*  | T                        | V<br>G | T                        | V<br>G | C                     | A<br>G |
|      | 711                   | GP2<br>GP3 | 237<br>30  | G                        | M<br>A | G                        | M<br>A | A                     | I<br>T |
|      | 1050                  | GP3        | 143        | T                        | F      | T                        | F      | C                     | L      |
|      | 1553                  | GP4        | 129        | G                        | V      | G                        | V      | A                     | I      |
|      | 1795                  | GP5<br>5a  | 27<br>30*  | C                        | A<br>C | T                        | V<br>C | C                     | A<br>C |
|      | 1810                  | GP5<br>5a  | 32<br>35*  | G                        | S<br>Q | A                        | K<br>Q | A                     | N<br>Q |
|      | 1811                  | GP5<br>5a  | 32<br>36   | C                        | S<br>Q | A                        | K<br>K | C                     | N<br>Q |
|      | 1838                  | GP5<br>5a  | 41*<br>45  | A                        | L<br>N | A                        | L<br>N | G                     | L<br>D |
|      | 1884                  | GP5        | 57         | G                        | E      | G                        | E      | A                     | K      |
| 3068 | 20                    | GP2<br>E   | 7<br>5*    | G                        | R<br>Q | Not<br>Applicable        |        | A                     | K<br>Q |
|      | 1050                  | GP3        | 143        | T                        | F      |                          |        | C                     | L      |
|      | 1523                  | GP4        | 119        | A                        | S      |                          |        | G                     | G      |
|      | 1553                  | GP4        | 129        | G                        | V      |                          |        | A                     | I      |
|      | 1795                  | GP5<br>5a  | 27<br>30*  | T                        | V<br>C |                          |        | C                     | A<br>C |
|      | 2489                  | M          | 63         | T                        | L      |                          |        | G                     | V      |

<sup>a</sup> The nucleotide (NT) position is based on the ORF2-6 region, with the first nucleotide of the GP2 start site designated 1. The amino acid (AA) denotes the associated protein, amino acid and amino acid position in the protein. Shaded regions indicate sites where a NT change occurs in an overlapping reading frame, and the amino acids changes and position is listed for reading frames.

<sup>b</sup> Haplotypes A and B represent the haplotypes present at the highest and second highest frequencies within each pig, respectively. <sup>c</sup> The consensus nucleotide and amino acid in the inoculum. \* Synonymous change.

**Table S2.** Amino acid changes in ORF2-6 haplotypes predominant in late day samples from pigs with prolonged viremia.

| Pig  | Position <sup>a</sup> |           | Haplotype A <sup>b</sup> |             | Haplotype B <sup>b</sup> |             | Inoculum <sup>c</sup> |        |
|------|-----------------------|-----------|--------------------------|-------------|--------------------------|-------------|-----------------------|--------|
|      | NT                    | AA        | NT                       | AA          | NT                       | AA          | NT                    | AA     |
| 1134 | 122                   | GP2<br>E  | 41<br>39*                | T<br>L<br>F | C<br>S<br>F              | T<br>L<br>F | T<br>L<br>F           | L<br>F |
|      | 131                   | GP2<br>E  | 44<br>42*                | C<br>P<br>A | T<br>L<br>A              | T<br>L<br>A | T<br>L<br>A           | L<br>A |
|      | 1050                  | GP3       | 143                      | T<br>F      | T<br>F                   | C<br>L      | C<br>L                | L      |
|      | 1523                  | GP4       | 119                      | A<br>S      | G<br>G                   | G<br>G      | G<br>G                | G<br>G |
|      | 1553                  | GP4       | 129                      | G<br>V      | G<br>V                   | A<br>I      | A<br>I                | I      |
| 3161 | 289                   | GP2       | 97                       | G<br>V      | G<br>V                   | A<br>M      | A<br>M                | M      |
|      | 1050                  | GP3       | 143                      | T<br>F      | T<br>F                   | C<br>L      | C<br>L                | L      |
|      | 1553                  | GP4       | 129                      | G<br>V      | G<br>V                   | A<br>I      | A<br>I                | I      |
|      | 1810                  | GP5<br>5a | 32<br>35*                | G<br>S<br>Q | A<br>N<br>Q              | A<br>N<br>Q | A<br>N<br>Q           | N<br>Q |

<sup>a</sup> The nucleotide (NT) position is based on the ORF2-6 region, with the first nucleotide of the GP2 start site designated 1. The amino acid (AA) denotes the associated protein, amino acid and amino acid position in the protein. Shaded regions indicate sites where a NT change occurs in an overlapping reading frame, and the amino acids changes and position is listed for reading frames.

<sup>b</sup> Haplotypes A and B represent the haplotypes present at the highest and second highest frequencies within each pig, respectively. <sup>c</sup> The consensus nucleotide and amino acid in the inoculum. \* Synonymous change.

**Table S3.** List of Chimeric Viruses Assayed for Neutralization and/or Replication Phenotype.

| Pig  | Haplotype | ORF2-6 <sup>a</sup> | ORF2-4 <sup>a</sup> | ORF5-6 <sup>a</sup> |
|------|-----------|---------------------|---------------------|---------------------|
| 1113 | A         | v1113A              | v1113A-2-4          | v1113A-5            |
|      | B         | v1113B              | v1113B-2-4          | v1113B-5            |
| 1134 | A         | v1134A              | ND <sup>b</sup>     | ND <sup>b</sup>     |
| 3068 | A         | v3068C              | v3068C2-4           | v3068C-5            |
| 3161 | A         | v3161A              | ND                  | ND                  |
| 3197 | A         | v3197A              | v3197A-2-4          | v3197A-5            |
|      | B         | v3197B              | v3197B-2-4          | v3197B-5            |

<sup>a</sup> Region of PRRSV genome contained in chimeric virus; <sup>b</sup> Not Done.

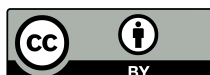

© 2017 by the authors. Submitted for possible open access publication under the terms and conditions of the Creative Commons Attribution (CC BY) license (<http://creativecommons.org/licenses/by/4.0/>).
